# Supplementary material for: Influenza Vaccination Uptake and Hesitancy among Healthcare Workers in Early 2021 at the Start of the COVID-19 Vaccine Rollout in Cape Town, South Africa
Source: MDPI journal article supplement (doi:10.3390/vaccines10081176), 2022-07-25
Supplement: s1 [file s1]

**Supplementary Table S1: Questionnaire**

|                                                                                                                                                                                                                                                                                                                                                                                                                                                                                                                                                                                                                                                                 |                                                                                                                    |                                                                                                                                                  |
|-----------------------------------------------------------------------------------------------------------------------------------------------------------------------------------------------------------------------------------------------------------------------------------------------------------------------------------------------------------------------------------------------------------------------------------------------------------------------------------------------------------------------------------------------------------------------------------------------------------------------------------------------------------------|--------------------------------------------------------------------------------------------------------------------|--------------------------------------------------------------------------------------------------------------------------------------------------|
| Participants ID ..... [number to be assigned by study investigators].<br><br>Initials.....<br><br>Date of birth.....<br><br>Healthcare worker role:<br>Doctor, Nurse, Nursing assistant, Counsellor, Radiologist, Audiologist, Occupational therapist, Physiotherapist, Clinical research worker, Pharmacist, Admin Support staff, Other (specify.....)<br><br>Gender:<br>1=Female, 2=Male, 3=Other<br><br>Education attainment:<br>Matric, Diploma, BSc, Honours, MBBS/MBChB, MSc, PhD, Other (Specify.....)<br><br>Personal income:<br>Less than R10000 per month, R10000-R50000 per month, More than R50000 per month<br><br>Religion:.....<br><br>Date..... |                                                                                                                    |                                                                                                                                                  |
| <b>Instruction:</b> Please evaluate how much you disagree or agree with the following statements                                                                                                                                                                                                                                                                                                                                                                                                                                                                                                                                                                |                                                                                                                    |                                                                                                                                                  |
| <b>A. Influenza vaccination</b>                                                                                                                                                                                                                                                                                                                                                                                                                                                                                                                                                                                                                                 |                                                                                                                    |                                                                                                                                                  |
| 1.                                                                                                                                                                                                                                                                                                                                                                                                                                                                                                                                                                                                                                                              | I have received at least one dose of the influenza vaccine in the past                                             | 1= No, 2= Yes                                                                                                                                    |
| 2.                                                                                                                                                                                                                                                                                                                                                                                                                                                                                                                                                                                                                                                              | During the next influenza season, I will take the influenza vaccine.                                               | 1 = strongly disagree, 2 = moderately disagree, 3 = slightly disagree, 4 = neutral, 5 = slightly agree, 6 = moderately agree, 7 = strongly agree |
| 3.                                                                                                                                                                                                                                                                                                                                                                                                                                                                                                                                                                                                                                                              | Influenza vaccination is compatible with my religion                                                               | 1 = strongly disagree, 2 = moderately disagree, 3 = slightly disagree, 4 = neutral, 5 = slightly agree, 6 = moderately agree, 7 = strongly agree |
| 4.                                                                                                                                                                                                                                                                                                                                                                                                                                                                                                                                                                                                                                                              | I am completely confident that influenza vaccines are safe.                                                        | 1 = strongly disagree, 2 = moderately disagree, 3 = slightly disagree, 4 = neutral, 5 = slightly agree, 6 = moderately agree, 7 = strongly agree |
| 5.                                                                                                                                                                                                                                                                                                                                                                                                                                                                                                                                                                                                                                                              | Influenza vaccinations are effective.                                                                              | 1 = strongly disagree, 2 = moderately disagree, 3 = slightly disagree, 4 = neutral, 5 = slightly agree, 6 = moderately agree, 7 = strongly agree |
| 6.                                                                                                                                                                                                                                                                                                                                                                                                                                                                                                                                                                                                                                                              | Regarding influenza vaccines, I am confident that public authorities decide in the best interest of the community. | 1 = strongly disagree, 2 = moderately disagree, 3 = slightly disagree, 4 = neutral, 5 = slightly agree, 6 = moderately agree, 7 = strongly agree |
|                                                                                                                                                                                                                                                                                                                                                                                                                                                                                                                                                                                                                                                                 |                                                                                                                    |                                                                                                                                                  |

|                                |                                                                                                                         |                                                                                                                                                  |
|--------------------------------|-------------------------------------------------------------------------------------------------------------------------|--------------------------------------------------------------------------------------------------------------------------------------------------|
| 7.                             | Influenza vaccination is unnecessary because influenza is not common anymore.                                           | 1 = strongly disagree, 2 = moderately disagree, 3 = slightly disagree, 4 = neutral, 5 = slightly agree, 6 = moderately agree, 7 = strongly agree |
| 8.                             | My immune system is so strong, it also protects me against influenza                                                    | 1 = strongly disagree, 2 = moderately disagree, 3 = slightly disagree, 4 = neutral, 5 = slightly agree, 6 = moderately agree, 7 = strongly agree |
| 9.                             | Influenza is not so severe that I should get vaccinated.                                                                | 1 = strongly disagree, 2 = moderately disagree, 3 = slightly disagree, 4 = neutral, 5 = slightly agree, 6 = moderately agree, 7 = strongly agree |
|                                |                                                                                                                         |                                                                                                                                                  |
| 10.                            | Everyday stress prevents me from getting the influenza vaccine                                                          | 1 = strongly disagree, 2 = moderately disagree, 3 = slightly disagree, 4 = neutral, 5 = slightly agree, 6 = moderately agree, 7 = strongly agree |
| 11.                            | For me, it is inconvenient to receive influenza vaccinations                                                            | 1 = strongly disagree, 2 = moderately disagree, 3 = slightly disagree, 4 = neutral, 5 = slightly agree, 6 = moderately agree, 7 = strongly agree |
| 12.                            | Visiting a vaccination clinic makes me feel uncomfortable; this keeps me from getting vaccinated against influenza      | 1 = strongly disagree, 2 = moderately disagree, 3 = slightly disagree, 4 = neutral, 5 = slightly agree, 6 = moderately agree, 7 = strongly agree |
|                                |                                                                                                                         |                                                                                                                                                  |
| 13.                            | When I think about getting vaccinated against influenza, I weigh benefits and risks to make the best decision possible. | 1 = strongly disagree, 2 = moderately disagree, 3 = slightly disagree, 4 = neutral, 5 = slightly agree, 6 = moderately agree, 7 = strongly agree |
| 14.                            | For every influenza vaccine dose, I closely consider whether it is useful for me.                                       | 1 = strongly disagree, 2 = moderately disagree, 3 = slightly disagree, 4 = neutral, 5 = slightly agree, 6 = moderately agree, 7 = strongly agree |
| 15.                            | It is important for me to fully understand the topic of vaccination, before I get vaccinated against influenza.         | 1 = strongly disagree, 2 = moderately disagree, 3 = slightly disagree, 4 = neutral, 5 = slightly agree, 6 = moderately agree, 7 = strongly agree |
|                                |                                                                                                                         |                                                                                                                                                  |
| 16.                            | When everyone is vaccinated against influenza, I don't have to get vaccinated, too.                                     | 1 = strongly disagree, 2 = moderately disagree, 3 = slightly disagree, 4 = neutral, 5 = slightly agree, 6 = moderately agree, 7 = strongly agree |
| 17.                            | I get vaccinated against influenza because I can also protect people with a weaker immune system.                       | 1 = strongly disagree, 2 = moderately disagree, 3 = slightly disagree, 4 = neutral, 5 = slightly agree, 6 = moderately agree, 7 = strongly agree |
| 18.                            | Vaccination is a collective action to prevent the spread of diseases like influenza.                                    | 1 = strongly disagree, 2 = moderately disagree, 3 = slightly disagree, 4 = neutral, 5 = slightly agree, 6 = moderately agree, 7 = strongly agree |
|                                |                                                                                                                         |                                                                                                                                                  |
| <b>B. Covid-19 vaccination</b> |                                                                                                                         |                                                                                                                                                  |
|                                |                                                                                                                         |                                                                                                                                                  |
| 19.                            | I have received a COVID-19 vaccine                                                                                      | 1= No, 2= Yes                                                                                                                                    |
| 21.                            | I will take the COVID-19 vaccine when one becomes available                                                             | 1 = strongly disagree, 2 = moderately disagree, 3 = slightly disagree, 4 = neutral, 5 = slightly agree, 6 = moderately agree, 7 = strongly agree |
| 21                             | COVID-19 vaccination is compatible with my religion                                                                     | 1 = strongly disagree, 2 = moderately disagree, 3 = slightly disagree, 4 = neutral, 5 = slightly agree, 6 = moderately agree, 7 = strongly agree |

|     |                                                                                                                              |                                                                                                                                                  |
|-----|------------------------------------------------------------------------------------------------------------------------------|--------------------------------------------------------------------------------------------------------------------------------------------------|
| 22. | I am completely confident that Covid-19 vaccines are safe.                                                                   | 1 = strongly disagree, 2 = moderately disagree, 3 = slightly disagree, 4 = neutral, 5 = slightly agree, 6 = moderately agree, 7 = strongly agree |
| 23. | Covid-19 vaccination will be effective.                                                                                      | 1 = strongly disagree, 2 = moderately disagree, 3 = slightly disagree, 4 = neutral, 5 = slightly agree, 6 = moderately agree, 7 = strongly agree |
| 24. | Regarding Covid-19 vaccines, I am confident that public authorities decide in the best interest of the community.            | 1 = strongly disagree, 2 = moderately disagree, 3 = slightly disagree, 4 = neutral, 5 = slightly agree, 6 = moderately agree, 7 = strongly agree |
|     |                                                                                                                              |                                                                                                                                                  |
| 25. | Covid-19 vaccination is unnecessary because Covid-19 is not common anymore.                                                  | 1 = strongly disagree, 2 = moderately disagree, 3 = slightly disagree, 4 = neutral, 5 = slightly agree, 6 = moderately agree, 7 = strongly agree |
| 27. | My immune system is so strong, it also protects me against Covid-19                                                          | 1 = strongly disagree, 2 = moderately disagree, 3 = slightly disagree, 4 = neutral, 5 = slightly agree, 6 = moderately agree, 7 = strongly agree |
| 28. | Covid-19 infection is not so severe that I should get vaccinated.                                                            | 1 = strongly disagree, 2 = moderately disagree, 3 = slightly disagree, 4 = neutral, 5 = slightly agree, 6 = moderately agree, 7 = strongly agree |
|     |                                                                                                                              |                                                                                                                                                  |
| 29. | Everyday stress will prevent me from getting vaccinated against Covid-19                                                     | 1 = strongly disagree, 2 = moderately disagree, 3 = slightly disagree, 4 = neutral, 5 = slightly agree, 6 = moderately agree, 7 = strongly agree |
| 30. | For me, it is inconvenient to receive vaccinations against Covid-19.                                                         | 1 = strongly disagree, 2 = moderately disagree, 3 = slightly disagree, 4 = neutral, 5 = slightly agree, 6 = moderately agree, 7 = strongly agree |
| 31. | Visiting the vaccination clinic will make me feel uncomfortable; this will keep me from getting vaccinated against Covid-19. | 1 = strongly disagree, 2 = moderately disagree, 3 = slightly disagree, 4 = neutral, 5 = slightly agree, 6 = moderately agree, 7 = strongly agree |
|     |                                                                                                                              |                                                                                                                                                  |
| 32. | When I think about getting vaccinated against Covid-19, I weigh benefits and risks to make the best decision possible.       | 1 = strongly disagree, 2 = moderately disagree, 3 = slightly disagree, 4 = neutral, 5 = slightly agree, 6 = moderately agree, 7 = strongly agree |
| 33. | For every Covid-19 vaccine dose, I will closely consider whether it is useful for me.                                        | 1 = strongly disagree, 2 = moderately disagree, 3 = slightly disagree, 4 = neutral, 5 = slightly agree, 6 = moderately agree, 7 = strongly agree |
| 34. | It is important for me to fully understand the topic of vaccination, before I get vaccinated against Covid-19.               | 1 = strongly disagree, 2 = moderately disagree, 3 = slightly disagree, 4 = neutral, 5 = slightly agree, 6 = moderately agree, 7 = strongly agree |
|     |                                                                                                                              |                                                                                                                                                  |
| 35. | When everyone is vaccinated against Covid-19, I don't have to get vaccinated, too.                                           | 1 = strongly disagree, 2 = moderately disagree, 3 = slightly disagree, 4 = neutral, 5 = slightly agree, 6 = moderately agree, 7 = strongly agree |
| 36. | I will get vaccinated against Covid-19 because I can also protect people with a weaker immune system.                        | 1 = strongly disagree, 2 = moderately disagree, 3 = slightly disagree, 4 = neutral, 5 = slightly agree, 6 = moderately agree, 7 = strongly agree |
| 37. | Vaccination is a collective action to prevent the spread of diseases like Covid-19.                                          | 1 = strongly disagree, 2 = moderately disagree, 3 = slightly disagree, 4 = neutral, 5 = slightly agree, 6 = moderately agree, 7 = strongly agree |
